# Supplementary material for: Diagnostic yield of screening for SARS-CoV-2 among patients admitted to hospital for alternate diagnoses: an observational cohort study
Source: PubMed Central journal article supplement — BMJ Open. 2022 Aug 10;12(8):e057852. doi: 10.1136/bmjopen-2021-057852 (PMC9378945; doi:10.1136/bmjopen-2021-057852), 2022-08-10
Supplement: bmjopen-2021-057852supp001.pdf [file bmjopen-2021-057852supp001.pdf]

**APPENDIX & SUPPLEMENT**

**Appendix A:** List of hospital sites, with an inclusion start and end date for this study.

| Site Name                                                                | Province         | Start Date  | End Date    |
|--------------------------------------------------------------------------|------------------|-------------|-------------|
| Vancouver General Hospital                                               | British Columbia | 1-Mar-2020  | 31-Aug-2020 |
| Lions Gate Hospital                                                      | British Columbia | 1-Mar-2020  | 29-Apr-2020 |
| Saint Paul's Hospital                                                    | British Columbia | 1-Mar-2020  | 23-May-2020 |
| Mount Saint Joseph Hospital                                              | British Columbia | 1-Mar-2020  | 24-Mar-2020 |
| Surrey Memorial Hospital                                                 | British Columbia | 19-Mar-2020 | 30-Apr-2020 |
| Royal Columbian Hospital                                                 | British Columbia | 1-Mar-2020  | 31-May-2020 |
| Abbotsford Regional Hospital                                             | British Columbia | 20-Apr-2020 | 15-Jul-2020 |
| University of Alberta Hospital                                           | Alberta          | 8-Apr-2020  | 7-May-2020  |
| Foothills Medical Centre                                                 | Alberta          | 1-Mar-2020  | 7-Apr-2020  |
| Rockyview General Hospital                                               | Alberta          | 1-Mar-2020  | 7-Apr-2020  |
| Peter Lougheed Centre                                                    | Alberta          | 1-Mar-2020  | 12-Dec-2020 |
| South Health Campus                                                      | Alberta          | 1-Mar-2020  | 12-Dec-2020 |
| St Paul's Hospital                                                       | Saskatchewan     | 17-Mar-2020 | 30-Apr-2020 |
| Royal University Hospital                                                | Saskatchewan     | 17-Mar-2020 | 31-Oct-2020 |
| Saskatoon City Hospital                                                  | Saskatchewan     | 17-Mar-2020 | 30-Apr-2020 |
| Sunnybrook Health Sciences Centre                                        | Ontario          | 14-May-2020 | 31-Oct-2020 |
| The Ottawa Hospital - Civic Campus                                       | Ontario          | 14-May-2020 | 31-May-2020 |
| Health Science North                                                     | Ontario          | 14-May-2020 | 29-Dec-2020 |
| Toronto Western Hospital                                                 | Ontario          | 1-Sep-2020  | 31-Sep-2020 |
| Hotel-Dieu de Lévis                                                      | Quebec           | 4-May-2020  | 18-May-2020 |
| Jewish General Hospital                                                  | Quebec           | 1-Mar-2020  | 4-Jun-2020  |
| Hôpital de l'Enfant-Jésus, CHU de Québec                                 | Quebec           | 4-May-2020  | 23-Jul-2020 |
| IUCPQ: Institut universitaire de cardiologie et de pneumologie de Québec | Quebec           | 4-May-2020  | 13-May-2020 |
| Hôpital du Sacré-Coeur de Montreal                                       | Quebec           | 4-May-2020  | 18-May-2020 |
| Saint John Regional Hospital                                             | New Brunswick    | 12-Mar-2020 | 12-Apr-2020 |
| Halifax Infirmary                                                        | Nova Scotia      | 5-Apr-2020  | 15-Apr-2020 |
| Dartmouth General Hospital                                               | Nova Scotia      | 5-Apr-2020  | 15-Apr-2020 |
| Hants Community Hospital                                                 | Nova Scotia      | 5-Apr-2020  | 15-Apr-2020 |
| Cobequid Community Health Centre                                         | Nova Scotia      | 5-Apr-2020  | 15-Apr-2020 |
| Secondary Assessment Centers of Dartmouth General and Halifax Infirmary  | Nova Scotia      | 26-Mar-2020 | 15-May-2020 |

BMJ Article Template

**Supplement Table 1.** Network coordinating center staff at the University of British Columbia

| Name              | Roles                | Contributions                                                                                       |
|-------------------|----------------------|-----------------------------------------------------------------------------------------------------|
| Jeffrey Hau       | Data manager         | REDCap, data processing and analysis for manuscripts.                                               |
| Vi Ho             | National coordinator | Coordinate with provincial coordinators and training/onboarding of research assistants.             |
| Serena Small      | Research coordinator | Ethics & privacy reviews, data management plan, privacy impact assessment, and qualitative analyses |
| Amber Cragg       | Research manager     | Data and manuscript management                                                                      |
| Wei Zhao          | Data analyst         | Data processing and analysis for manuscripts.                                                       |
| Vicky Wu          | Data analyst         | Data processing and analysis for manuscripts.                                                       |
| Elnaz Bodaghkhani | Research associate   | Data and manuscript management                                                                      |

**Supplement Table 2.** Provincial Coordinators

| Name              | Province | Institutional affiliation                                                                                | Contributions to CCEDRRN                                                                         |
|-------------------|----------|----------------------------------------------------------------------------------------------------------|--------------------------------------------------------------------------------------------------|
| Corinne DeMone    | NS       | Dalhousie University, Halifax, Nova Scotia                                                               | Research ethics board submission, manages research assistants, data cleaning and quality.        |
| Jacqueline Fraser | NB       | Dalhousie University, St. John New Brunswick                                                             | Site coordinator as well as research assistant.                                                  |
| Martyne Audet     | QC       | Centre intégré de santé et de services sociaux de Chaudière-Appalaches (Hôtel-Dieu de Lévis site), Lévis | Provincial research coordinator, translation of research material to French, ethics management.  |
| Connie Taylor     | ON       | Queen's University, Kingston                                                                             | Coordination of research assistants in Ontario, maintenance of REB applications for the province |
| Kate Mackenzie    | MB       | Health Sciences Centre, Winnipeg                                                                         | Lead RA for the province                                                                         |
| Aimee Goss        | SK       | University of Saskatchewan, Saskatoon                                                                    | Screens records in Saskatoon, data/extraction and entry, coordinates research assistants.        |
| Hina Walia        | AB       | University of Calgary, Calgary                                                                           | Provincial coordinator lead for Alberta, oversight of all Alberta sites.                         |
| Josie Kanu        | BC       | University of British Columbia, Vancouver                                                                | Provincial coordinator lead for BC, oversight of all BC sites.                                   |

**Supplement Table 3.** Institutional research assistant (RA) leads

| <b>Name</b>          | <b>Province</b> | <b>Institutional affiliation(s)</b>                                                                                                                                                      |
|----------------------|-----------------|------------------------------------------------------------------------------------------------------------------------------------------------------------------------------------------|
| Corinne DeMone       | NS              | Dartmouth General Hospital, Cobequid Community Health Centre, Hants Community Hospital<br>Secondary Assessment Centers of the Dartmouth General Hospital, and Halifax Infirmery, Halifax |
| Jacqueline Fraser    | NB              | Saint John Regional Hospital, Saint John                                                                                                                                                 |
| Alexandra Nadeau     | QC              | CHU de Québec Université Laval, Quebec City                                                                                                                                              |
| Audrey Nolet         | QC              | Centre intégré de santé et de services sociaux de Chaudière-Appalaches (Hôtel-Dieu de Lévis site), Lévis                                                                                 |
| Xiaoqing Xue         | QC              | Jewish General Hospital, Montréal                                                                                                                                                        |
| David Iannuzzi       | QC              | McGill University Health Center, Montréal                                                                                                                                                |
| Chantal Lanthier     | QC              | Hôpital du Sacré-Cœur de Montréal, Montréal                                                                                                                                              |
| Konika Nirmalanathan | ON              | University Health Network, Toronto                                                                                                                                                       |
| Vlad Latiu           | ON              | Kingston General Hospital, Hotel Dieu Hospital, Kingston                                                                                                                                 |
| Joanna Yeung         | ON              | Sunnybrook Health Sciences Center, Toronto                                                                                                                                               |
| Natasha Clayton      | ON              | Hamilton General Hospital, Juravinski Hospital, Hamilton                                                                                                                                 |
| Tom Chen             | ON              | London Health Sciences Centre, London                                                                                                                                                    |
| Jenna Nichols        | ON              | Health Sciences North, Sudbury                                                                                                                                                           |
| Kate Mackenzie       | MB              | Health Sciences Centre, Winnipeg                                                                                                                                                         |
| Aimee Goss           | SK              | St. Paul's Hospital, Royal University Hospital, Saskatoon City Hospital, Saskatoon                                                                                                       |
| Stacy Ruddell        | AB              | Foothills Medical Centre, Peter Lougheed Centre, Rockyview General Hospital, South Health Campus, Calgary                                                                                |
| Natalie Runham       | AB              | University of Alberta Hospital, Edmonton                                                                                                                                                 |
| Karlin Su            | AB              | Royal Alexandra Hospital/Northeast Community Health Center, Edmonton                                                                                                                     |
|                      | BC              | St. Paul's Hospital, Mount Saint Joseph, Vancouver                                                                                                                                       |
| Bernice Huynh        | BC              | Abbotsford Regional Hospital and Cancer Center, Abbotsford                                                                                                                               |
| Amanda Swirhun       | BC              | Royal Columbian Hospital, New Westminster                                                                                                                                                |
| Tracy Taylor         | BC              | Eagle Ridge Hospital and Health Care Centre, Port Moody                                                                                                                                  |
| Mai Hayashi          | BC              | Royal Inland Hospital, Kamloops                                                                                                                                                          |
| Mackenzie Cheyne     | BC              | Kelowna General Hospital, Kelowna                                                                                                                                                        |
| Sarim Asim           | BC              | Surrey Memorial Hospital, Surrey                                                                                                                                                         |
| Katherine Lam        | BC              | Vancouver General Hospital, Vancouver                                                                                                                                                    |
| Kelsey Compagna      | BC              | Lions Gate Hospital, Vancouver                                                                                                                                                           |

**Supplement Table 4.** Contributing Study Sites and Investigators

| <b>Lead Investigator</b>        | <b>Contributing Site / Code</b>                                               | <b>Member Investigators</b> |
|---------------------------------|-------------------------------------------------------------------------------|-----------------------------|
| <b>Maritime</b>                 |                                                                               |                             |
| Patrick Fok                     |                                                                               |                             |
| <b>Nova Scotia</b>              |                                                                               |                             |
| Hana Wiemer                     | Halifax Infirmary/ 902                                                        | Patrick Fok                 |
|                                 | Dartmouth General Hospital/ 903                                               | Hana Wiemer                 |
|                                 | Hants Community Hospital/ 904                                                 | Samuel Campbell             |
|                                 | Cobequid Community Health Centre/ 905                                         | Kory Arsenault              |
|                                 | Secondary Assessment Centers of Dartmouth General and Halifax Infirmary/ 908  | Tara Dahn                   |
| <b>New Brunswick</b>            |                                                                               |                             |
| Kavish Chandra                  | Saint John Regional Hospital/ 901                                             | Kavish Chandra              |
| <b>Quebec</b>                   |                                                                               |                             |
| Patrick Archambault             | Hotel-Dieu de Lévis/ 701                                                      | Patrick Archambault         |
|                                 | Jewish General Hospital/ 702                                                  | Joel Turner                 |
|                                 | Centre Hospitalier de l'Université Laval (CHU de Québec)/ 703                 | Éric Mercier                |
|                                 | L'hôpital Royal Victoria - Royal Victoria Hospital/ 705                       | Greg Clark                  |
|                                 | Hôpital de l'Enfant-Jésus, CHU de Québec/ 706                                 | Éric Mercier                |
|                                 | Hôpital du Saint-Sacrement, CHU de Québec/ 707                                | Éric Mercier                |
|                                 | Hôpital Saint-François d'Assise, CHU de Québec/ 708                           | Éric Mercier                |
|                                 | Hôtel-Dieu de Québec, CHU de Québec/ 709                                      | Éric Mercier                |
|                                 | IUCPQ: Institut universitaire de cardiologie et de pneumologie de Québec/ 710 | Sébastien Robert            |
|                                 | Hôpital du Sacré-Coeur de Montreal/ 711                                       | Raoul Daoust                |
| <b>Ontario</b>                  |                                                                               |                             |
| Laurie Morrison & Steven Brooks | Sunnybrook/ 401                                                               | Ivy Cheng                   |
|                                 | The Ottawa Hospital - Civic Campus/ 403                                       | Jeffrey Perry               |
|                                 | The Ottawa Hospital - General Campus/ 404                                     | Jeffrey Perry               |
|                                 | Kingston/Queens/ 406                                                          | Steven Brooks               |
|                                 | Hamilton General Hospital/ 407                                                | Michelle Welsford           |
|                                 | Health Science North, Sudbury Ontario/ 408                                    | Rob Ohle                    |
|                                 | University Hospital – LHSC/ 409                                               | Justin Yan                  |
|                                 | North York General Hospital, Toronto/ 410                                     | Rohit Mohindra              |
|                                 | Victoria Hospital – LHSC/ 412                                                 | Justin Yan                  |
| Toronto Western Hospital/ 414   | Megan Landes                                                                  |                             |
| <b>Manitoba</b>                 |                                                                               |                             |
| Tomislav Jelic                  | Health Sciences Centre/ 307                                                   | Tomislav Jelic              |
| <b>Saskatchewan</b>             |                                                                               |                             |
| Phil Davis                      | St Paul's Hospital, Saskatoon/ 303                                            | Phil Davis                  |
|                                 | Royal University, Saskatoon/ 304                                              | Phil Davis                  |

## BMJ Article Template

|                                 |                                                  |                                 |
|---------------------------------|--------------------------------------------------|---------------------------------|
|                                 | Saskatoon City Hospital, Saskatoon/ 305          | Phil Davis                      |
| <b>Alberta</b>                  |                                                  |                                 |
| Andrew McRae                    | University of Alberta Hospital, Edmonton/ 201    | Brian Rowe                      |
|                                 | Foothills, Calgary/ 202                          | Katie Lin                       |
|                                 | Rockyview, Calgary/ 203                          | Andrew McRae                    |
|                                 | Peter Lougheed Centre/ 204                       | Andrew McRae                    |
|                                 | South Campus, Calgary/ 205                       | Stephanie VandenBerg            |
|                                 | Northeast Community Health Centre, Edmonton/ 206 | Jake Hayward, Jaspreet Khangura |
|                                 | Royal Alexandra Hospital, Edmonton/ 306          | Jake Hayward, Jaspreet Khangura |
|                                 | <b>British Columbia</b>                          |                                 |
| Corinne Hohl                    | Vancouver General Hospital/ 101                  | Daniel Ting                     |
|                                 | Lions Gate Hospital/ 102                         | Maja Stachura                   |
|                                 | Saint Paul's Hospital/ 103                       | Frank Scheuermeyer              |
|                                 | Mount St Joseph's/ 104                           | Frank Scheuermeyer              |
|                                 | Surrey Memorial Hospital/ 105                    | Balijeet Braar                  |
|                                 | Royal Columbian Hospital/ 106                    | John Taylor                     |
|                                 | Abbotsford Regional Hospital/ 107                | Ian Martin                      |
|                                 | Eagle Ridge Hospital/ 108                        | Sean Wormsbecker                |
|                                 | Royal Inland Hospital/ 112                       | Ian Martin                      |
| Kelowna General / Hospital/ 115 | Lee Graham                                       |                                 |
